# Supplementary material for: Dynamic behaviour of Ru and Ru–Pt complexes containing tetrahedro-P4 ligand
Source: Royal Society of Chemistry journal article supplement (doi:10.1039/c1dt10572h), 2011-01-01
Supplement: c1dt10572h.pdf [file c1dt10572h.pdf]

# Dynamic Behaviour of Ru and Ru-Pt complexes containing tetrahedron-P4 Ligand

Vincenzo Mirabello, Maria Caporali, Vito Gallo, Luca Gonsalvi, Andrea Ienco, Mario Latronico, Piero Mastrorilli, Maurizio Peruzzini\*

## Supporting information

### Experimental Details

**General details.** All reactions and manipulations were carried out under nitrogen using standard Schlenk glassware and techniques. Dichloromethane was purified by distillation over CaH<sub>2</sub>. Literature methods were used for the preparation of [Ru(dppm)<sub>2</sub>(H)<sub>2</sub>],<sup>S1</sup> [Ru(dppm)<sub>2</sub>(H)(η<sup>2</sup>-H<sub>2</sub>)]BF<sub>4</sub>,<sup>S2</sup> and [Pt(C<sub>2</sub>H<sub>4</sub>)(PPh<sub>3</sub>)<sub>2</sub>].<sup>S3</sup> Deuterated solvents (Aldrich) were pre-treated with three freeze-thaw pump cycles before use, and kept under an inert atmosphere.

Solution multinuclear NMR spectra were recorded on a BRUKER AVANCE 400 spectrometer, equipped with a variable temperature control unit. <sup>1</sup>H chemical shifts are referenced to tetramethylsilane (TMS), <sup>31</sup>P chemical shifts are referenced to 85% H<sub>3</sub>PO<sub>4</sub>, <sup>195</sup>Pt chemical shifts are referenced to H<sub>2</sub>PtCl<sub>6</sub>.

### Experimental Section

**Synthesis of *trans*-[Ru(dppm)<sub>2</sub>(H)(η<sup>1</sup>-P<sub>4</sub>)]BF<sub>4</sub> ([2]BF<sub>4</sub>).** A solution of white phosphorus in THF (0.10 M, 2.29 mL, 0.229 mmol) was syringed into a solution of *trans*-[Ru(dppm)<sub>2</sub>(H)(η<sup>2</sup>-H<sub>2</sub>)]BF<sub>4</sub> (200 mg, 0.229 mmol) in CH<sub>2</sub>Cl<sub>2</sub> (10 mL). After 15 minutes the resulting dark brown solution was concentrated under vacuum. Addition of 20 mL of diethyl ether gave an ivory colored solid which was filtered off and washed with toluene 25 mL. Yield: 84%, 209 mg. Crystals suitable for X-ray analysis were obtained from a diluted CH<sub>2</sub>Cl<sub>2</sub>/*n*-hexane (1:1) solution by slow concentration under nitrogen. The crystals were filtered off and dried in the air. El. Anal. (%) for C<sub>50</sub>H<sub>45</sub>BF<sub>4</sub>P<sub>8</sub>Ru (1081.56), calcd: C, 55.53; H, 4.19; found: C, 55.71; H, 4.25. ESI-MS *m/z* (%): 995.07 (35.69). <sup>1</sup>H NMR (400 MHz, CD<sub>2</sub>Cl<sub>2</sub>, 295 K): δ = 7.91-6.86 (m, 40H, Ph), 4.88 (br s, 2H, CH<sub>2</sub>), 4.56 (bs, 2H, CH<sub>2</sub>), -3.69 ppm (br d, 1H, Ru-H, <sup>2</sup>J<sub>H,Ptrans</sub> = 162 Hz). <sup>31</sup>P {<sup>1</sup>H} NMR (162 MHz, CD<sub>2</sub>Cl<sub>2</sub>, 295 K): δ = -2.5 (d, 4P, P<sub>A</sub>, <sup>1</sup>J<sub>PAPM</sub> = 23 Hz), -373.4 (q, 1P, P<sub>M</sub>, <sup>1</sup>J<sub>PMPQ</sub> = 224 Hz), -492.5 ppm (d, 3P, P<sub>Q</sub>, <sup>1</sup>J<sub>PMPQ</sub> = 224 Hz). IR (CH<sub>2</sub>Cl<sub>2</sub>): ν(Ru-H) 1975 cm<sup>-1</sup>.

**Synthesis of *trans*-[ $\{\text{Ru}(\text{dppm})_2(\text{H})\}(\mu, \eta^{1:2}\text{-P}_4)\{\text{Pt}(\text{PPh}_3)_2\}]\text{BF}_4$  (**[3]**BF<sub>4</sub>).** Solid  $[\text{Pt}(\text{C}_2\text{H}_4)(\text{PPh}_3)_2]$  (140 mg, 0.183 mmol) was added portion-wise to a solution of **[2]**BF<sub>4</sub> (200 mg, 0.183 mmol) in 10 mL of CH<sub>2</sub>Cl<sub>2</sub> under nitrogen at room temperature. After stirring for 5 min, the solution was concentrated under vacuum and the product was isolated as pale brown solid by addition of diethyl ether (10 mL). Yield 220 mg (66%). El. Anal. (%) for C<sub>86</sub>H<sub>75</sub>BF<sub>4</sub>P<sub>10</sub>RuPt (1801.21), calcd: C, 57.35; H, 4.20; found: C, 57.04; H, 4.24. ESI-MS *m/z* (%): 1713.45 (86) [ $\{\text{Ru}(\text{dppm})_2(\text{H})\}(\mu, \eta^{1:2}\text{-P}_4)\{\text{Pt}(\text{PPh}_3)_2\}]^+$ . <sup>1</sup>H NMR (400 MHz, CD<sub>2</sub>Cl<sub>2</sub>, 180 K):  $\delta$  = 7.61–6.72 (m, 40H, Ph), 5.01 (br s, 2H, CH<sub>2</sub>), 4.53 (bs, 2H, CH<sub>2</sub>), -5.48 (br d, 1H, Ru-H, <sup>2</sup>J<sub>H,P<sub>trans</sub></sub> = 107 Hz). <sup>31</sup>P{<sup>1</sup>H} NMR (162 MHz, CD<sub>2</sub>Cl<sub>2</sub>, 180 K):  $\delta$  = 23.9 (br, 2P, P<sub>Z</sub>, <sup>1</sup>J<sub>PZPt</sub> = 2270 Hz); -2.3 (d, 4P, P<sub>A</sub>, <sup>2</sup>J<sub>PA<sub>PM</sub></sub> = 21 Hz); -213.2 (pq, 1P, P<sub>M</sub>, <sup>1</sup>J<sub>PMPS</sub> = <sup>1</sup>J<sub>PM-PQ</sub> = 201 Hz); -259.9 (m, 2P, P<sub>S</sub>), -346.0 (dt, 1P, P<sub>Q</sub>, <sup>1</sup>J<sub>PSPQ</sub> = 96 Hz). <sup>195</sup>Pt NMR (86.01 MHz, CD<sub>2</sub>Cl<sub>2</sub>, 180 K):  $\delta$  = -3987 (tt, Pt, <sup>1</sup>J<sub>PZPt</sub> = 2270 Hz, <sup>1</sup>J<sub>PSPt</sub> = 820 Hz). IR (CH<sub>2</sub>Cl<sub>2</sub>):  $\nu(\text{Ru-H})$  1966 cm<sup>-1</sup>.

**VT-NMR monitoring of **[3]**BF<sub>4</sub>.** Complex **[2]**BF<sub>4</sub> (35 mg, 0.032 mmol) and  $[\text{Pt}(\text{C}_2\text{H}_4)(\text{PPh}_3)_2]$  (24.5 mg, 0.032 mmol) were placed into a 5 mm NMR tube under an inert atmosphere. CD<sub>2</sub>Cl<sub>2</sub> (0.5 mL) was transferred into the tube using a Hamilton<sup>®</sup> microsyringe. The resulting solution (complex **[3]**BF<sub>4</sub>) was brought to 180 K using a liquid nitrogen-acetone bath and the tube was then inserted into the NMR probe head pre-cooled at the same temperature. Subsequently, the probe was warmed slowly to room temperature in steps of 10 K each, and sets of multinuclear NMR data were collected at each step (Fig. S1-S2).

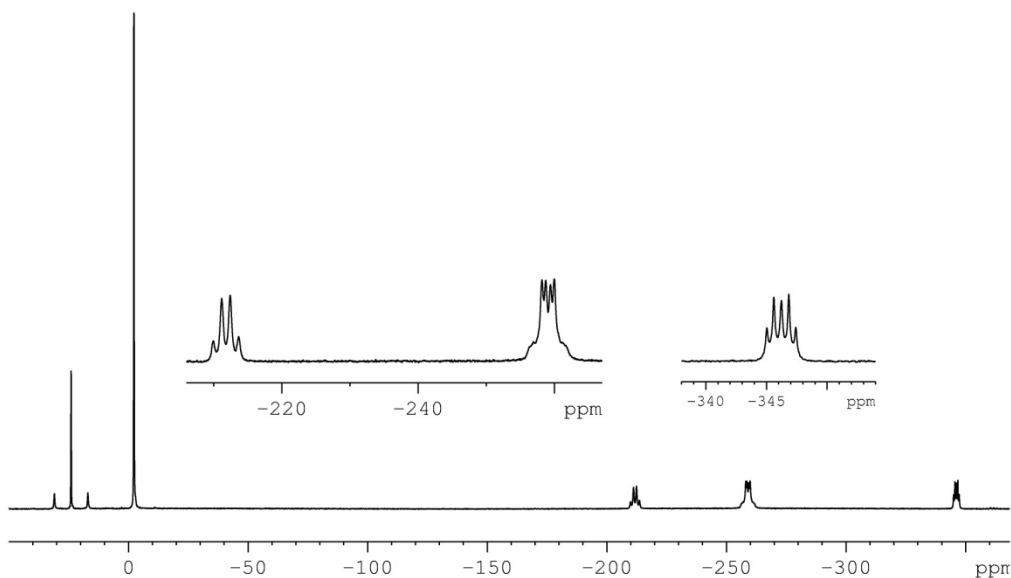

**Figure S1.** <sup>31</sup>P{<sup>1</sup>H} NMR of complex **[3]**BF<sub>4</sub> (CD<sub>2</sub>Cl<sub>2</sub>, 180 K)

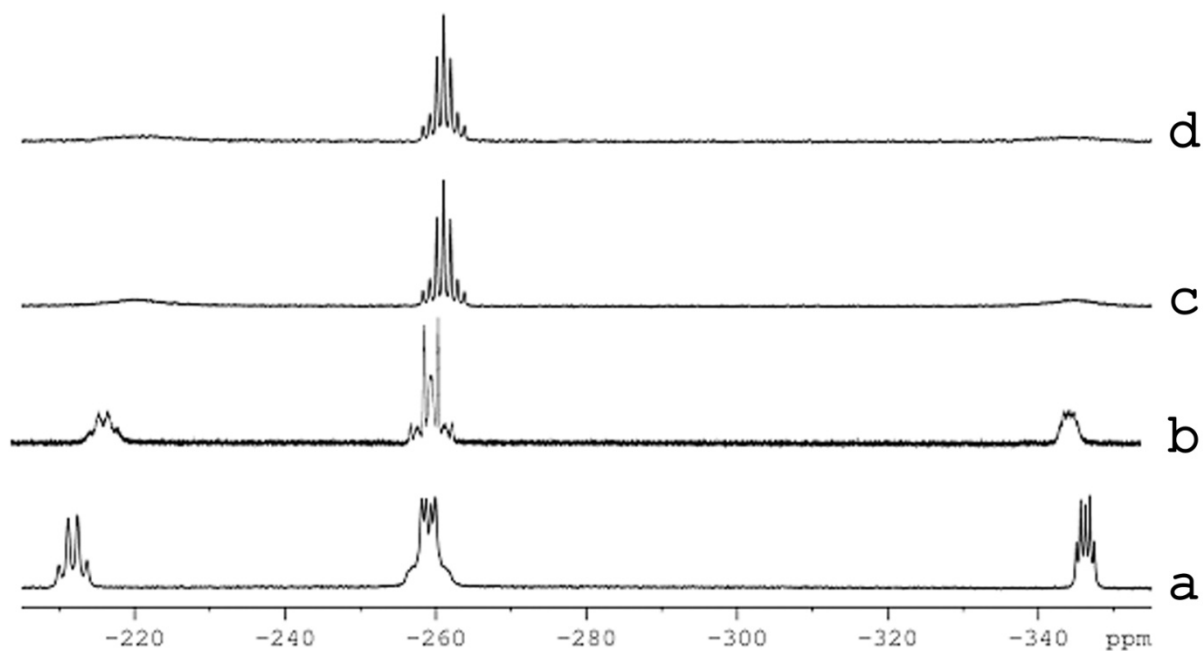

**Figure S2.** Portion of the  $^{31}\text{P}\{^1\text{H}\}$  NMR spectra of complex  $[\mathbf{3}]\text{BF}_4$  (in  $\text{CD}_2\text{Cl}_2$ ) recorded at 180 K (a), 258 K (b), 298 K (c), 308 K (d).

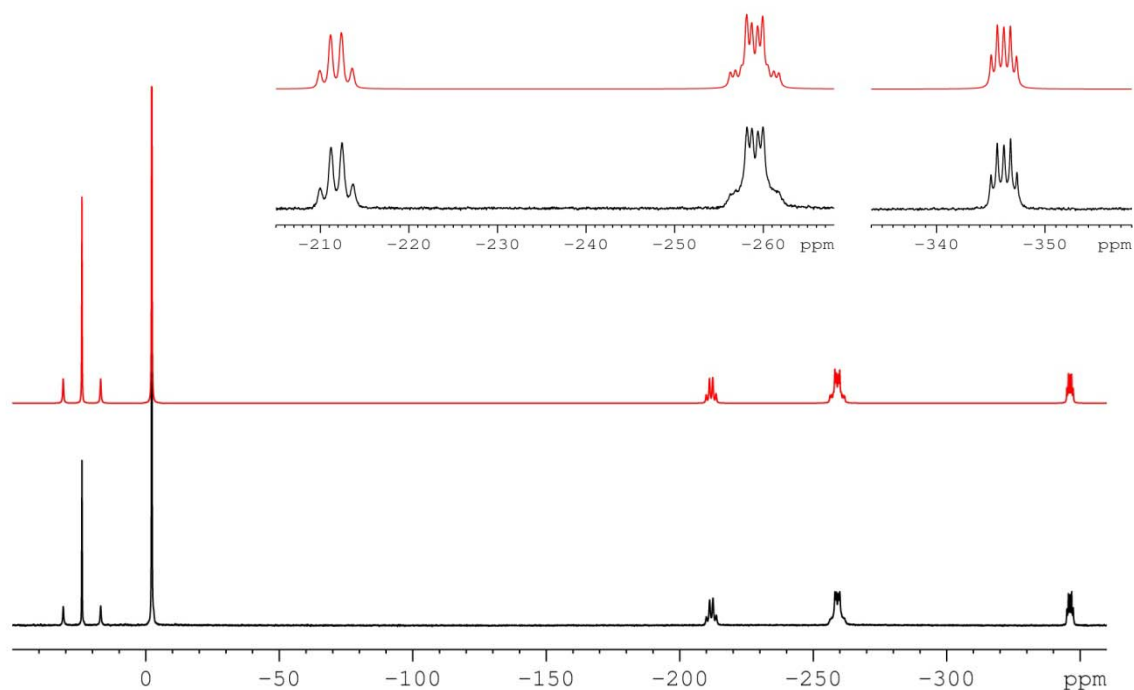

**Figure S3.** Experimental (black) and calculated (red)  $^{31}\text{P}\{^1\text{H}\}$  NMR of complex  $[\mathbf{3}]\text{BF}_4$  (200 K). Calculated spectrum was obtained by DAISY package in TOPSPIN 2.1 PL4 software.

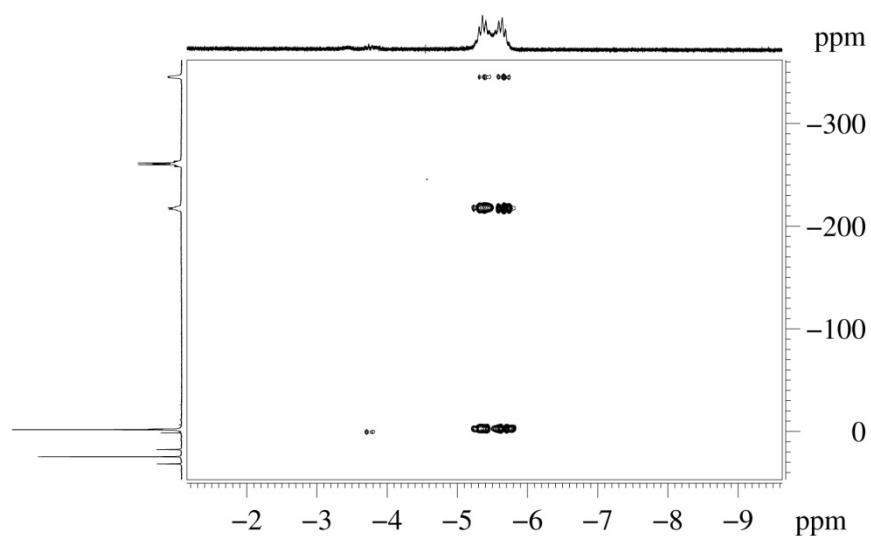

**Figure S4.** Portion ( $^1\text{H}$  hydride region) of the  $^1\text{H}$ - $^{31}\text{P}$  HMQC spectrum of  $[\mathbf{3}]\text{BF}_4$  ( $\text{CD}_2\text{Cl}_2$ , 258 K)

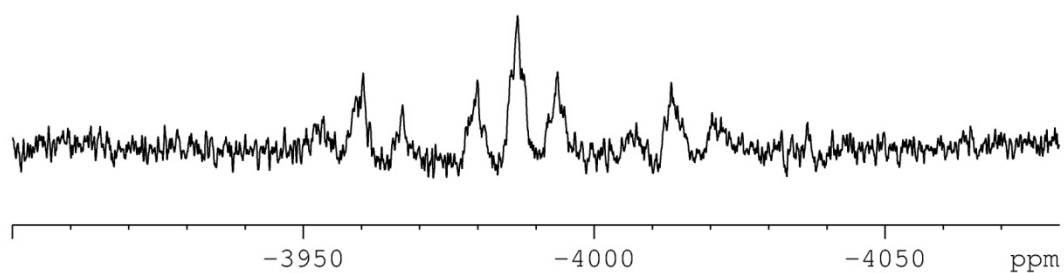

**Figure S5.**  $^{195}\text{Pt}\{^1\text{H}\}$  NMR spectrum of complex  $[\mathbf{3}]\text{BF}_4$  (298 K,  $\text{CD}_2\text{Cl}_2$ )

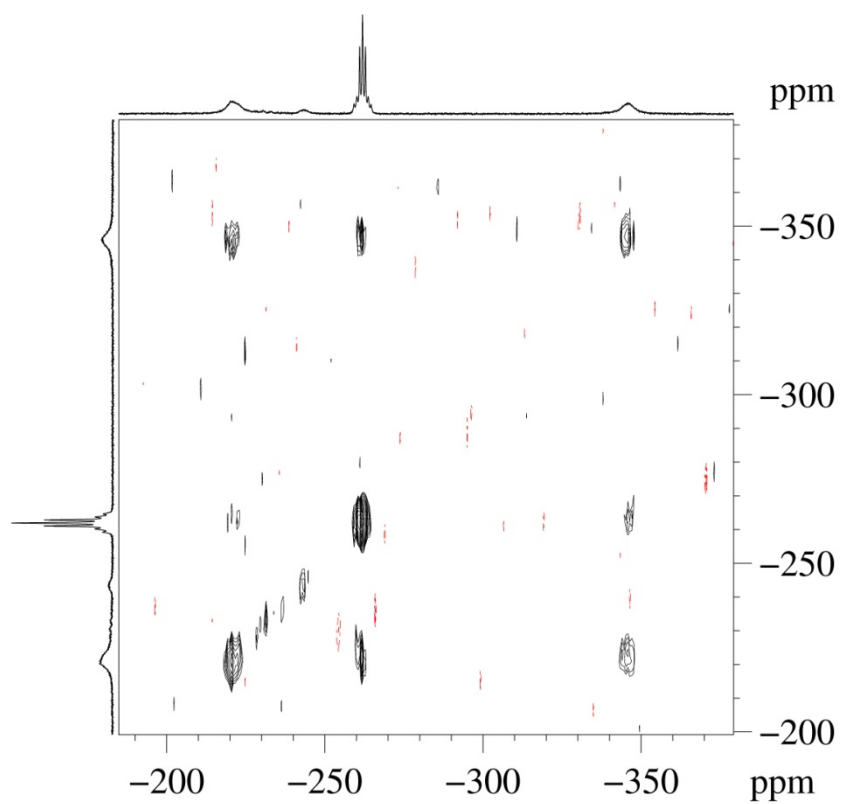

**Figure S6.** High-field part of the <sup>31</sup>P EXSY 2D-NMR spectrum of [3]BF<sub>4</sub> (CHCl<sub>2</sub>CHCl<sub>2</sub>, T = 32 °C, τ<sub>m</sub> = 50 ms, 162 MHz).

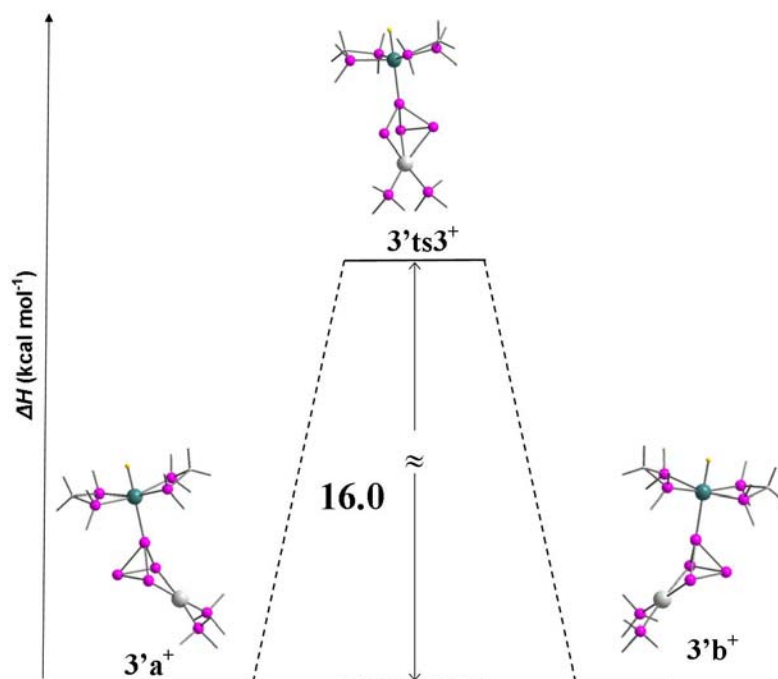

**Figure S7.** Enthalpy profiles for the additional motion, of platinum  $\eta^2$ - $\eta^1$  coordinated to three phosphorus atoms in complex **3'**.

**Activation parameters for the exchange processes.** Exchange constants ( $K_{\text{obs}}$ ) were determined by a line shape analysis performed with Dynamic NMR package in TOPSPIN 2.1 PL4 software.

Activation parameters were extracted by  $\ln\left(\frac{k_{\text{obs}} \cdot h}{k_B \cdot T}\right)$  vs  $1/T$  plot according to equation 1.

$$\ln\left(\frac{k_{\text{obs}} \cdot h}{k_B \cdot T}\right) = -\frac{\Delta H^\ddagger}{R \cdot T} + \frac{\Delta S^\ddagger}{R}$$

Equation 1

### Complex 2<sup>+</sup>

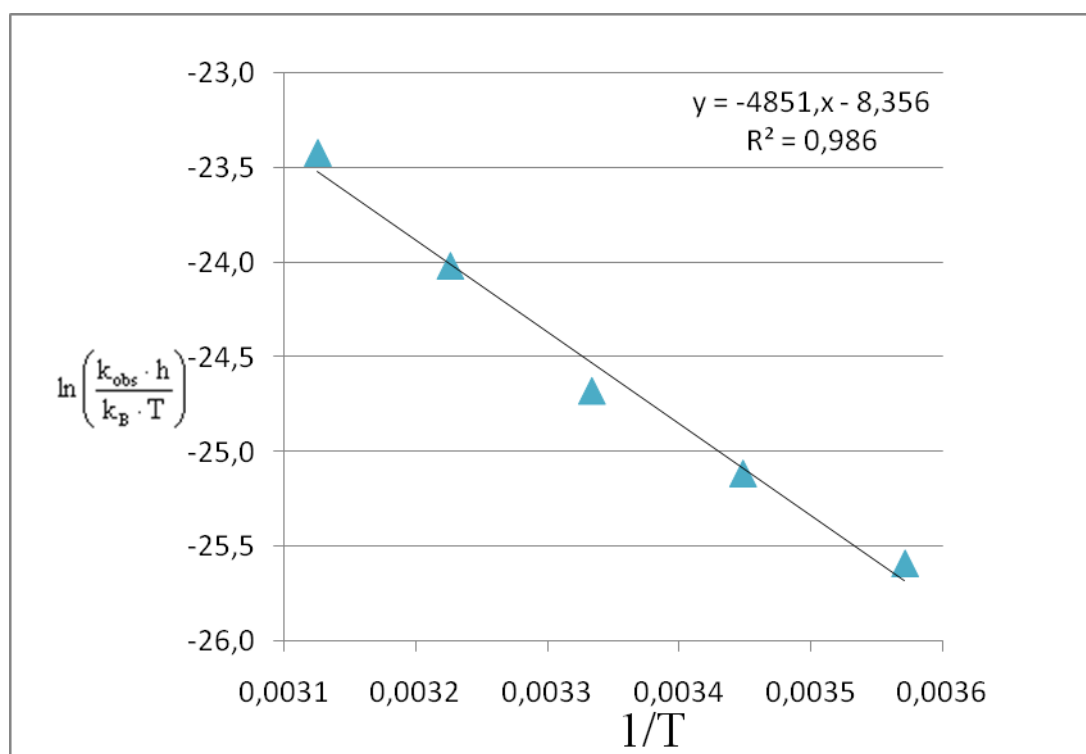

### Complex 3<sup>+</sup>

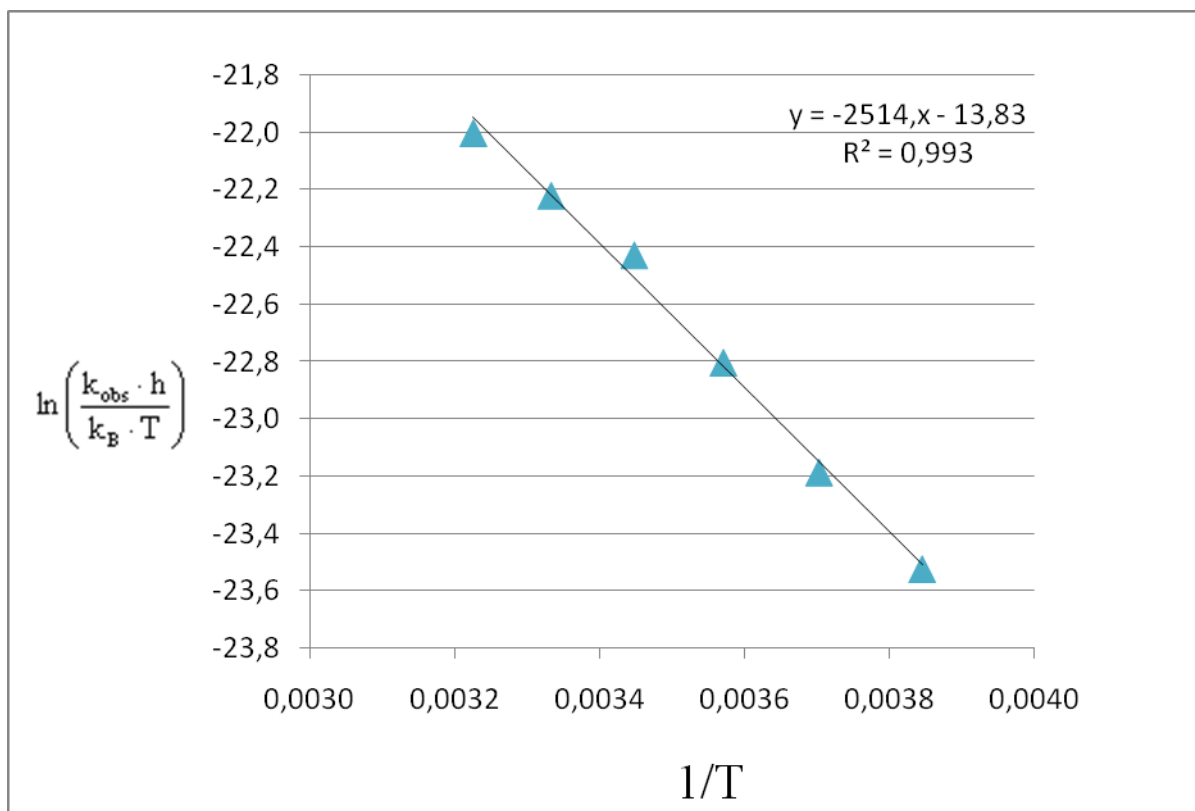



## Computational details

**DFT Calculations.** Structural optimizations were carried out at the hybrid density functional theory (DFT) using the Gaussian03 suite of programs.<sup>S4</sup> The method used was the Becke's three-parameter hybrid exchange-correlation functional<sup>S5</sup> containing the nonlocal gradient correction of Lee, Yang and Parr (B3LYP).<sup>S6</sup> Calculations of the frequencies were performed to validate the nature of the optimized stationary points. The Stuttgart/Dresden effective core potential was used for metals.<sup>S7</sup> The basis set used for the remaining atomic species was the 6-31G(d, p).<sup>S8</sup>

**Table S1:** Free Gibbs energies, enthalpies and internal energies differences in kcal/mol for the calculated models in gas phase. The effect of the zero-point vibrations was considered in the reported values.

|                   | $\Delta G$ | $\Delta H$ | $\Delta E$ |
|-------------------|------------|------------|------------|
| $2'a^+ - 2'c^+$   | 9.0        | 8.3        | 8.2        |
| $2'a^+ - 2'ts^+$  | 10.6       | 9.1        | 9.4        |
| $2'c^+ - 2'ts^+$  | 1.5        | 0.7        | 1.1        |
| $3'a^+ - 3'c^+$   | 10.7       | 9.4        | 9.7        |
| $3'a^+ - 3'ts1^+$ | 11.7       | 9.6        | 9.9        |
| $3'c^+ - 3'ts1^+$ | 1.0        | 0.2        | 0.2        |
| $3'c^+ - 3'ts3^+$ | 19.5       | 16.0       | 16.7       |

### $2'a^+$ and $2'b^+$

Energy = -2909.6626088

Zero-point vibrational energy 394840.5 (Joules/Mol)

Zero-point correction = 0.150387 (Hartree/Particle)

Thermal correction to Energy = 0.168211

Thermal correction to Enthalpy = 0.169155

Thermal correction to Gibbs Free Energy = 0.101091

Sum of electronic and zero-point Energies = -2909.512222

Sum of electronic and thermal Energies = -2909.494398

Sum of electronic and thermal Enthalpies = -2909.493454

Sum of electronic and thermal Free Energies = -2909.561518

Ru, -0.0299495238, 0.0039315815, -0.16065191

H, 0.0426091585, 0.1013459908, 1.4495625993

P, -0.1335403613, -0.1306796364, -2.5628646592

P, 1.0932404851, -0.0397214383, -4.3831484154

P, -0.9543582511, 0.857070966, -4.345356971

P,-0.708117376,-1.3702386733,-4.2795155411  
P,-1.186173449,2.045897888,0.070205  
P,-2.2959864513,-0.4921588877,0.2748916429  
P,1.1505081627,-2.0058548465,0.2113320863  
P,2.2621802293,0.5312803499,0.0069132071  
C,-2.7819758597,1.2733265498,0.6827770188  
H,-2.8791161537,1.4026201446,1.7638542581  
H,-3.6940730965,1.6333974878,0.2021651465  
C,2.7906716007,-1.1741303276,0.5820829908  
H,2.9824493426,-1.1718110613,1.6582424629  
H,3.658791707,-1.5956997485,0.0710109437  
H,-0.8653071327,3.0464057762,1.0119637175  
H,-1.5898823503,2.8702508885,-1.0049327881  
H,-2.7406797962,-1.2673766987,1.3666246111  
H,-3.2478194213,-0.9015077547,-0.6867667278  
H,1.4642862206,-2.9694602051,-0.7742327094  
H,0.9136127986,-2.8736752217,1.2982448134  
H,2.8109429532,1.4325303849,0.9436600209  
H,3.1090425646,0.8051154917,-1.0914047973

## 2<sup>+</sup>c<sup>+</sup>

Energy =-2909.6489318  
Zero-point vibrational energy 393399.0 (Joules/Mol)  
Zero-point correction= 0.149838 (Hartree/Particle)  
Thermal correction to Energy= 0.167839  
Thermal correction to Enthalpy= 0.168784  
Thermal correction to Gibbs Free Energy= 0.101823  
Sum of electronic and zero-point Energies= -2909.499094  
Sum of electronic and thermal Energies= -2909.481092  
Sum of electronic and thermal Enthalpies= -2909.480148  
Sum of electronic and thermal Free Energies= -2909.547109

Ru,0.0058362616,0.0893671851,-0.2448439267  
H,0.0308159936,0.0788833306,1.355456611  
P,0.433527278,1.1707808347,-2.7797982082  
P,0.9596868363,-0.3300628324,-4.3317970201  
P,-1.0738975897,0.5615243279,-4.2945638089  
P,-0.5003072625,-0.9592364953,-2.7792641323  
P,-1.1563060158,2.1137939488,0.1480579918  
P,-2.271193303,-0.4243584985,0.148447486  
P,1.1792987208,-1.9397300833,0.0855987687  
P,2.2938588055,0.5985267818,0.0846196958  
C,-2.7522988526,1.3009728981,0.6991161503  
H,-2.8521508209,1.3449929098,1.7866802429  
H,-3.6617128452,1.7003629738,0.2454122059

C,2.7915565812,-1.1336595922,0.5978098266  
H,2.9247965754,-1.1917757269,1.6811251854  
H,3.6865485611,-1.5268417463,0.1111989439  
H,-0.8189538186,3.0187789014,1.1771839126  
H,-1.559149702,3.042986215,-0.8395937362  
H,-2.7096544951,-1.2848749735,1.1776019236  
H,-3.2277991845,-0.7563579614,-0.8393804406  
H,1.5513941341,-2.855516363,-0.9263318815  
H,0.8737723433,-2.8583969616,1.1125314069  
H,2.7636657456,1.4457306441,1.1109885713  
H,3.2198670532,0.9436822832,-0.9275617682

## 2'ts<sup>+</sup>

Energy =-2909.6467673

\*\*\*\*\* 1 imaginary frequencies (negative Signs) \*\*\*\*\*

Zero-point vibrational energy 392517.9 (Joules/Mol)

Zero-point correction= 0.149502 (Hartree/Particle)

Thermal correction to Energy= 0.166816

Thermal correction to Enthalpy= 0.167760

Thermal correction to Gibbs Free Energy= 0.102102

Sum of electronic and zero-point Energies= -2909.497265

Sum of electronic and thermal Energies= -2909.479952

Sum of electronic and thermal Enthalpies= -2909.479007

Sum of electronic and thermal Free Energies= -2909.544665

Ru,-0.0187243651,0.030296565,-0.1703361945  
H,0.0242934391,0.0592281397,1.4224588284  
P,0.5447654578,1.4404142685,-3.1163712138  
P,1.0035494816,-0.2361250453,-4.4663124385  
P,-1.041227291,0.6627604259,-4.4291600823  
P,-0.3562244102,-0.6244337194,-2.7498238196  
P,-1.1788661764,2.0661344265,0.1223141418  
P,-2.2899072659,-0.4732269931,0.240105342  
P,1.1583413028,-1.9885349026,0.1740350737  
P,2.2738812217,0.5485852739,0.0557607498  
C,-2.7664341331,1.2730365979,0.7306216399  
H,-2.8417638202,1.3554042688,1.81805682  
H,-3.6868577473,1.6551553235,0.2841354005  
C,2.7817325704,-1.165160793,0.6254123274  
H,2.9266914402,-1.1794125496,1.7088148004  
H,3.6714180013,-1.5786028185,0.1457601568  
H,-0.8458920736,3.0344898396,1.0940937103  
H,-1.607027298,2.9371946168,-0.9077716735  
H,-2.7387224819,-1.2959787459,1.295668268  
H,-3.2473365412,-0.8309648161,-0.7379261117  
H,1.5112521324,-2.9212894176,-0.8292702791

H,0.8891321117,-2.8909210994,1.2256077083  
H,2.7935809734,1.435920398,1.0229787304  
H,3.1715464717,0.8356027563,-1.0001578848

**3'a<sup>+</sup> and 3'b<sup>+</sup>**

Energy =-3715.4588596  
Zero-point vibrational energy 540813.8 (Joules/Mol)  
Zero-point correction= 0.205985 (Hartree/Particle)  
Thermal correction to Energy= 0.232665  
Thermal correction to Enthalpy= 0.233610  
Thermal correction to Gibbs Free Energy= 0.141831  
Sum of electronic and zero-point Energies= -3715.252874  
Sum of electronic and thermal Energies= -3715.226194  
Sum of electronic and thermal Enthalpies= -3715.225250  
Sum of electronic and thermal Free Energies= -3715.317029

Ru,0.0821821605,-0.0316934769,0.3109733078  
H,-0.1756186811,-0.4550006982,1.8600976555  
P,0.4980044836,0.5662859067,-1.9901749389  
P,1.8373788821,1.9271382539,-3.1479961776  
P,-0.3008653206,0.0745502873,-4.0168010765  
P,1.8713279336,-0.3428341452,-3.4328041375  
P,-0.3279160008,2.1330136623,1.1290417609  
P,-2.243560417,0.304680095,0.3092471068  
P,0.4072573847,-2.3424052496,0.0110624154  
P,2.3260139542,-0.5118343761,0.832656441  
C,-2.1869496191,1.9157014826,1.2705222533  
H,-2.4726140309,1.7478224747,2.312096838  
H,-2.7910541666,2.7302781237,0.8652153535  
C,2.1344843485,-2.3760239341,0.7431113715  
H,2.123939578,-2.814058553,1.7443386922  
H,2.8843443297,-2.8910908793,0.1390791457  
H,0.0869632334,2.6085033049,2.3922091581  
H,-0.1809727623,3.3326418865,0.3928064519  
H,-3.175830117,-0.5039774028,0.9952975998  
H,-3.0271208988,0.6136148847,-0.8278835466  
H,0.5531210658,-2.9875998078,-1.2382907241  
H,-0.3053091019,-3.3496036647,0.6973834346  
H,2.929016624,-0.2608635788,2.0842502862  
H,3.4343002935,-0.2407847501,-0.0019773918  
Pt,0.2649558701,2.2137741894,-4.9295467871  
P,-1.4029917252,2.0795194173,-6.6325512182  
P,1.1869750062,4.3156553937,-5.5867064751  
H,2.5815952383,4.3486184908,-5.8039048849  
H,1.091695966,5.3819937726,-4.6652123698  
H,0.772512314,5.0065790871,-6.7497027774  
H,-1.4073112946,0.9063312227,-7.4179995439  
H,-1.5197457921,3.0333866758,-7.6710142104

H,-2.7522197382,2.0592979051,-6.2147880125

**3<sup>+</sup>c<sup>+</sup>**

Energy =-3715.4428504

Zero-point vibrational energy 539651.3 (Joules/Mol)

Zero-point correction= 0.205542 (Hartree/Particle)

Thermal correction to Energy= 0.232507

Thermal correction to Enthalpy= 0.233451

Thermal correction to Gibbs Free Energy= 0.142880

Sum of electronic and zero-point Energies= -3715.237308

Sum of electronic and thermal Energies= -3715.210344

Sum of electronic and thermal Enthalpies= -3715.2102100

Sum of electronic and thermal Free Energies= -3715.299971

Ru,2.8363336803,0.0179748388,-0.0019034886

H,4.4440710751,0.0247230733,-0.0013876743

P,0.2776777664,0.0273198245,-1.1414579076

P,-0.9990657156,-1.480904109,-0.029994867

P,-1.0110089664,1.4854429239,0.0218616247

P,0.2768079391,-0.0124624362,1.1347308385

P,3.1866073699,-1.8856934592,1.3512666946

P,3.1877555185,-1.8367037074,-1.4209653771

P,3.1721712863,1.924150734,-1.3549471439

P,3.1715215866,1.8757021672,1.4172876105

C,3.6731915639,-3.0270232704,-0.0552689082

H,4.7501715624,-3.2124579828,-0.0580880829

H,3.1495163843,-3.9851687998,-0.072428526

C,3.6484135349,3.0696464208,0.0517022623

H,4.723856636,3.2637777838,0.055357645

H,3.1169920149,4.0235281397,0.0682397293

H,4.2367973659,-1.989411159,2.2900166162

H,2.1974534159,-2.6088026636,2.058711512

H,4.2388837792,-1.9068571111,-2.3617606496

H,2.1994489905,-2.5344426796,-2.1546049186

H,2.177911861,2.6391699508,-2.0634712057

H,4.222308716,2.03588901,-2.2928263286

H,4.2212645388,1.9546464463,2.3589354282

H,2.1769787989,2.5656043306,2.1499003315

Pt,-2.8697753306,-0.005205971,-0.005938809

P,-4.4628089347,1.7656466503,0.0250546395

P,-4.4484939227,-1.7888291341,-0.0370820289

H,-4.4361873975,-2.6805240741,1.057932331

H,-4.3331567087,-2.7325566267,-1.0809478458

H,-5.842833026,-1.5615502242,-0.1089059402

H,-4.4576051448,2.6185250305,1.1506213652

H,-5.8552790491,1.5298110284,-0.0549776894

H,-4.3551431888,2.7462430552,-0.9851032371

**3<sup>+</sup>ts1<sup>+</sup> and 3<sup>+</sup>ts2<sup>+</sup>**

Energy =-3715.4424832

\*\*\*\*\* 1 imaginary frequencies (negative Signs) \*\*\*\*\*

Zero-point vibrational energy 539291.4 (Joules/Mol)  
Zero-point correction= 0.205405 (Hartree/Particle)  
Thermal correction to Energy= 0.231559  
Thermal correction to Enthalpy= 0.232503  
Thermal correction to Gibbs Free Energy= 0.144046  
Sum of electronic and zero-point Energies= -3715.237078  
Sum of electronic and thermal Energies= -3715.210924  
Sum of electronic and thermal Enthalpies= -3715.209980  
Sum of electronic and thermal Free Energies= -3715.298437

Ru,2.9128246322,0.017008711,0.0599778792  
H,4.5025644715,0.0273604205,-0.1675591192  
P,0.0414613091,0.0226423472,-0.9655780614  
P,-0.9930188218,-1.4873509908,0.3488480746  
P,-1.0050364407,1.4790104299,0.3989166382  
P,0.4871486735,-0.0129533835,1.2514351781  
P,3.4463353906,-1.8831623776,1.3507744205  
P,3.040255695,-1.8395069704,-1.3910117215  
P,3.0247017027,1.9233863825,-1.3261808734  
P,3.4312144417,1.8758539162,1.4155007428  
C,3.7436511575,-3.0188743308,-0.1120742679  
H,4.8138912756,-3.1725450407,-0.2716473477  
H,3.25109763,-3.9918663015,-0.0550515924  
C,3.7185557501,3.0637939762,-0.0073183228  
H,4.7874095625,3.2319380134,-0.161500704  
H,3.2178103043,4.0300371527,0.0832453842  
H,4.607421776,-1.9962732718,2.1473147361  
H,2.5527054354,-2.6082947315,2.1741368299  
H,3.9270412801,-1.9137766875,-2.4880039912  
H,1.9546651437,-2.5534253227,-1.9519131643  
H,1.9331074742,2.6471545854,-1.8622481308  
H,3.9106260198,2.0427633841,-2.4198837963  
H,4.5917223529,1.9709072658,2.2152336085  
H,2.5320751532,2.5647621681,2.2636026602  
Pt,-2.8296109081,-0.0176530226,0.7338449799  
P,-4.396835462,1.7482878194,1.0554764435  
P,-4.3822409268,-1.8062019579,0.9958583271  
H,-4.244022289,-2.6155223393,2.145028115  
H,-4.3636523603,-2.8221481541,0.01581636  
H,-5.7789713818,-1.591147475,1.0562610394  
H,-4.2665627562,2.5183788076,2.2322099061  
H,-5.7918404404,1.5199923797,1.1063714824  
H,-4.3853288446,2.7977155981,0.1112662871

**3'ts3<sup>+</sup>**

Energy =-3715.4325158

\*\*\*\*\* 1 imaginary frequencies (negative Signs) \*\*\*\*\*

Zero-point vibrational energy 541477.3 (Joules/Mol)  
Zero-point correction= 0.206238 (Hartree/Particle)  
Thermal correction to Energy= 0.231828  
Thermal correction to Enthalpy= 0.232772  
Thermal correction to Gibbs Free Energy= 0.146571  
Sum of electronic and zero-point Energies= -3715.226278  
Sum of electronic and thermal Energies= -3715.200688  
Sum of electronic and thermal Enthalpies= -3715.199743  
Sum of electronic and thermal Free Energies= -3715.285945

Ru,-2.8724079572,-0.0054791743,0.035865962  
H,-4.5082598995,-0.0138551716,0.1242038438  
P,-0.488377282,-0.0018175278,-0.0022212412  
P,0.9416205991,1.265563286,-1.1612518171  
P,0.9449746757,-0.901917091,-1.461694225  
P,0.977381865,-0.2227147461,1.607669563  
P,-3.2265665265,-1.7421199145,-1.5065787217  
P,-3.0885008324,-2.0077270515,1.2500913077  
P,-3.0868795713,1.7279239452,1.6109628868  
P,-3.2366214609,1.9933086631,-1.1443556795  
C,-3.632345737,-3.0434848702,-0.2169965982  
H,-4.7096164916,-3.2240130608,-0.1802804348  
H,-3.1170477191,-3.9992128789,-0.334440333  
C,-3.6506371095,3.018797287,0.3715251969  
H,-4.7302535543,3.1720914849,0.4452327082  
H,-3.1497641748,3.9870012022,0.4379266655  
H,-4.2902250162,-1.7940316246,-2.4336123974  
H,-2.2212598591,-2.347160242,-2.2966929216  
H,-4.0613042468,-2.2344670237,2.2477396453  
H,-2.0239999683,-2.7465982413,1.8163771491  
H,-2.0186610677,2.3539643106,2.2940273441  
H,-4.0487339957,1.7569006848,2.643917729  
H,-4.3006894931,2.2147228238,-2.0456333487  
H,-2.2364710648,2.7479187943,-1.8012063869  
Pt,2.7099513208,-0.0060665953,0.0756387362  
P,4.264314191,-0.2505288056,1.8431623618  
P,4.3861311418,0.2404520167,-1.6568486698  
H,5.302296494,1.3170496126,-1.6266527947  
H,3.8805044909,0.4231174266,-2.9615403657  
H,5.3075483509,-0.7981371173,-1.9246202311  
H,5.1782470341,0.7939669035,2.1083965597  
H,5.1781319581,-1.3279356289,1.81638689  
H,3.714195427,-0.4273827095,3.1283024362

**Crystallographic studies:** Data collection for complex *trans*-[Ru(dppm)<sub>2</sub>(H)(η<sup>1</sup>-P<sub>4</sub>)]BF<sub>4</sub> was carried out on a Oxford Diffraction Xcalibur3 diffractometer equipped with Mo K<sub>α</sub> radiation (0.71073 Å). Data were collected at 150 K. Data collection was performed with the program CrysAlis CCD<sup>S9</sup> and data reduction was carried out with the program CrysAlis RED<sup>S10</sup>. Absorption correction was applied through the program ABSPACK<sup>S10</sup>. Crystal data and structure refinement details are given in Table S1. The structure was solved with direct method implemented in the program Sir97<sup>S11</sup> and the refinement was completed by full-matrix least squares against F<sup>2</sup> using all data implemented in SHELXL<sup>S12</sup>. All the non-hydrogen atoms were refined anisotropically. Basal phosphorus atoms of the P<sub>4</sub> units show large anisotropic displacement parameters caused by the rotation of the P<sub>4</sub> units around the metal-coordinated phosphorus axes. Attempts to refine the disorder did not improve the overall refinement. The hydrogen atoms were set in calculated position and all refined isotropically with thermal factors depending on the ones of the atom to which they are bound. Molecular plots were produced by the program ORTEP3<sup>S13</sup>. All the calculations were performed using the package WINGX<sup>S14</sup>. Crystallographic data (excluding structure factors) for the compound reported in this paper have been deposited with the Cambridge Crystallographic Data Centre as supplementary publication CCDC 793923. Copies of the data can be obtained free of charge on application to CCDC, 12 Union Road, Cambridge CB2 1EZ, UK (fax: (+44) 1223-336-033; email: deposit@ccdc.cam.ac.uk).



**Table S2.** Crystal data and structure refinement for *trans*-[Ru(dppm)<sub>2</sub>(H)(η<sup>1</sup>-P<sub>4</sub>)]BF<sub>4</sub>.

|                                 |                                                                                                           |
|---------------------------------|-----------------------------------------------------------------------------------------------------------|
| Empirical formula               | C50 H45 B1 F4 P8 Ru1                                                                                      |
| Formula weight                  | 1081.5                                                                                                    |
| Temperature                     | 150(2) K                                                                                                  |
| Wavelength                      | 1.54184 Å                                                                                                 |
| Crystal system                  | Monoclinic                                                                                                |
| Space group                     | <i>P</i> 2 <sub>1</sub> /c                                                                                |
| Unit cell dimensions            | <i>a</i> = 17.5322(2) Å<br><i>b</i> = 23.5016(3) Å<br><i>c</i> = 23.7195(4) Å<br><i>b</i> = 94.9185(13)°. |
| Volume                          | 9737.3(2) Å <sup>3</sup>                                                                                  |
| <i>Z</i>                        | 8                                                                                                         |
| Density (calculated)            | 1.476 Mg/m <sup>3</sup>                                                                                   |
| Absorption coefficient          | 5.513 mm <sup>-1</sup>                                                                                    |
| F(000)                          | 4400                                                                                                      |
| Crystal size                    | .30 x .20 x .20 mm <sup>3</sup>                                                                           |
| Theta range for data collection | 3.76 to 62.03°.                                                                                           |
| Index ranges                    | -9 ≤ <i>h</i> ≤ 19, -25 ≤ <i>k</i> ≤ 26, -26 ≤ <i>l</i> ≤ 26                                              |
| Reflections collected           | 39029                                                                                                     |
| Independent reflections         | 14901 [ <i>R</i> <sub>(int)</sub> = 0.0539]                                                               |
| Completeness to theta = 62.03°  | 97.2 %                                                                                                    |

|                                   |                                                   |
|-----------------------------------|---------------------------------------------------|
| Absorption correction             | Semi-empirical from equivalents                   |
| Max. and min. transmission        | 0.332 and 0.139                                   |
| Refinement method                 | Full-matrix least-squares on F <sup>2</sup>       |
| Data / restraints / parameters    | 14901 / 0 / 967                                   |
| Goodness-of-fit on F <sup>2</sup> | 1.022                                             |
| Final R indices [I > 2σ(I)]       | R <sub>1</sub> = 0.0574, wR <sub>2</sub> = 0.1292 |
| R indices (all data)              | R <sub>1</sub> = 0.0962, wR <sub>2</sub> = 0.1479 |
| Largest diff. peak and hole       | 1.221 and -0.825 e.Å <sup>-3</sup>                |

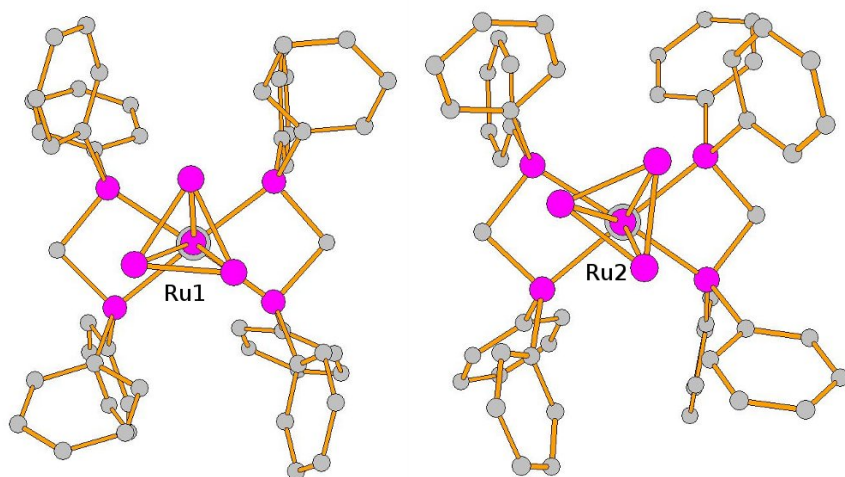

**Figure S8.** Ball and stick views of the two units of the cations *trans*-[(dppm)<sub>2</sub>Ru(H)(η<sup>1</sup>-P<sub>4</sub>)]<sup>+</sup>, 2<sup>+</sup>, emphasizing the different orientations of the P<sub>4</sub> ligand respect to the metal fragment.

## REFERENCES

- (S1) Hill, S.H.; Holah, D. G. ; Hughes, A. N. Prokopchuk, E.M. *Inorg. Chim. Acta* **1998**, 278, 226.
- (S2) Mathew, N.; Jarirdar, B. R.; Ranganathan, A. *Inorg. Chem.* **2003**, 42, 187-197.
- (S3) Nagel, U. *Chem. Ber.* **1982**, 115, 1998-1999.
- (S4) Frisch M.J.; et al. *Gaussian 03* , Revision C.02: Gaussian Inc.: Wallingford, CT, 2004.

- (S5) Becke, A. D. *J. Chem. Phys.* **1993**, *98*, 5648.
- (S6) Lee, C.; Yang, W.; Parr, R. *Phys. Rev.* **1998**, *B37*, 785.
- (S7) Dolg, M.; Stoll, H.; Preuss, H.; Pitzer, R. M. *J. Phys. Chem.* **1993**, *97*, 5852.
- (S8) Hariharan, P. C.; Pople, J. A. *Theor. Chim. Acta* **1973**, *28*, 213.
- (S9) CrysAlisCCD, Oxford Diffraction Ltd., Version 1.171.31.2 (release 07-07-2006 CrysAlis171 .NET)
- (S10) CrysAlis RED, Oxford Diffraction Ltd., Version 1.171.31.2 (release 07-07-2006 CrysAlis171 .NET)
- (S11) Altomare, A., Burla, M. C., Camalli, M., Cascarano, G. L., Giacovazzo, C., Guagliardi, A., Moliterni, A. G. G., Polidori, G. & Spagna, R., *J. Appl. Cryst.*, **1999**, *32*, 115;
- (S12) Sheldrick, G. M., *Acta Cryst.* **2008**, *A64*, 112
- (S13) Farrugia, L. J. *J. Appl. Crystallogr.* **1997**, *30*, 565.
- (S14) Farrugia, L. J. *J. Appl. Crystallogr.* **1999**, *32*, 837-838.
